# Supplementary material
Source: PubMed Central journal article supplement (PMC5998965)
Supplement: fj.201701367R.sf1.pdf [file fj.201701367R.sf1.pdf]

|         |                                                                                                                                                         |     |
|---------|---------------------------------------------------------------------------------------------------------------------------------------------------------|-----|
|         |                                                                                                                                                         | TM1 |
| hASIC1a | MELKAE <sup>A</sup> EEEEVGGVQPVSIQAFASSSTLHGLAHIFSYERLSLKRALWALCFLGSLAVLLCV                                                                             |     |
| mASIC1a | MELKTE <sup>T</sup> EEEEVGGVQPVSIQAFASSSTLHGLAHIFSYERLSLKRALWALCFLGSLAVLLCV                                                                             |     |
|         | 70                                                                                                                                                      |     |
| hASIC1a | CTERVQYYF <sup>H</sup> YHHVTKLDEVAASQLTFPAVTLCNLNEFRFSQVSKNDLYHAGELLALLNN                                                                               |     |
| mASIC1a | CTERVQYYF <sup>C</sup> YHHVTKLDEVAASQLTFPAVTLCNLNEFRFSQVSKNDLYHAGELLALLNN                                                                               |     |
| hASIC1a | RYEIPDTQMADEKQLEILQDKANFRSFKPKPFNMREFYDRAGHDIRDMLLSCHFRGE <sup>V</sup> C                                                                                |     |
| mASIC1a | RYEIPDTQMADEKQLEILQDKANFRSFKPKPFNMREFYDRAGHDIRDMLLSCHFRGE <sup>A</sup> CS                                                                               |     |
| hASIC1a | AEDFKVVFTRYGKCYTFNSGR <sup>R</sup> DGRPRLKTMKGGTGNGLEIMLDIQQDEYLPVWGETDETS                                                                              |     |
| mASIC1a | AEDFKVVFTRYGKCYTFNSGR <sup>Q</sup> DGRPRLKTMKGGTGNGLEIMLDIQQDEYLPVWGETDETS                                                                              |     |
|         |                                                                                                                                                         | 285 |
| hASIC1a | FEAGIKVQIHSQDEPPFIDQLGFGVAPGFQTFV <sup>A</sup> CQEQRLIYLP <sup>P</sup> PWGTCKAVTMDSDLD                                                                  |     |
| mASIC1a | FEAGIKVQIHSQDEPPFIDQLGFGVAPGFQTFV <sup>S</sup> CQEQRLIYLP <sup>S</sup> PWGT <sup>C</sup> NAV <sup>T</sup> MDS--D                                        |     |
| hASIC1a | FFDSYSITACRIDCETRYLVENCNCRMVHMPGDAPYCTPEQYKECADPALDFLVEKDQEY                                                                                            |     |
| mASIC1a | FFDSYSITACRIDCETRYLVENCNCRMVHMPGDAPYCTPEQYKECADPALDFLVEKDQEY                                                                                            |     |
| hASIC1a | CVCEMPCNLTRYGKELSMVKIPSKASAKYLAKKFNKSEQYIGENILVLDIFFEVLNYETI                                                                                            |     |
| mASIC1a | CVCEMPCNLTRYGKELSMVKIPSKASAKYLAKKFNKSEQYIGENILVLDIFFEVLNYETI                                                                                            |     |
|         |                                                                                                                                                         | TM2 |
| hASIC1a | EQKKAYEIA <sup>G</sup> LLGDIGGQMG <sup>L</sup> FIGASILT <sup>V</sup> LELFDYAYEVIK <sup>H</sup> KL <sup>R</sup> CRGK <sup>C</sup> QKEAKR <sup>S</sup> SA |     |
| mASIC1a | EQKKAYEIA <sup>G</sup> LLGDIGGQMG <sup>L</sup> FIGASILT <sup>V</sup> LELFDYAYEVIK <sup>R</sup> HL <sup>R</sup> CRGK <sup>C</sup> QKEAKR <sup>N</sup> SA |     |
| hASIC1a | DKGVALSLDDV <sup>K</sup> RHN <sup>P</sup> CE <sup>S</sup> LRGHPAGMTYAANILPHHPARGTFEDFT <sup>C</sup>                                                     |     |
| mASIC1a | DKGVALSLDDV <sup>K</sup> RHN <sup>P</sup> CE <sup>S</sup> LRGHPAGMTYAANILPHHPARGTFEDFT <sup>C</sup>                                                     |     |

**Supplemental Figure 1. Alignment of human and mouse ASIC1a protein sequences.**

Gray regions indicate the first and second transmembrane region (TM1 and TM2, respectively). The two key positions, 70 and 285, are highlighted in yellow.
